# Supplementary material for: Virtual reality technology for surgical learning: qualitative outcomes of the first virtual reality training course for emergency and essential surgery delivered by a UK–Uganda partnership
Source: PubMed Central journal article supplement — BMJ Open Qual. 2024 Jan 29;13(1):e002477. doi: 10.1136/bmjoq-2023-002477 (PMC10826552; doi:10.1136/bmjoq-2023-002477), 2024-01-29

## VRiMS/GASOC VIRTUAL REALITY SURGICAL CONFERENCE

### UGANDAN PROGRAM

UCU SoM & ACE (IDI-Makerere), Kampala

26<sup>th</sup>-29<sup>th</sup> April 2022

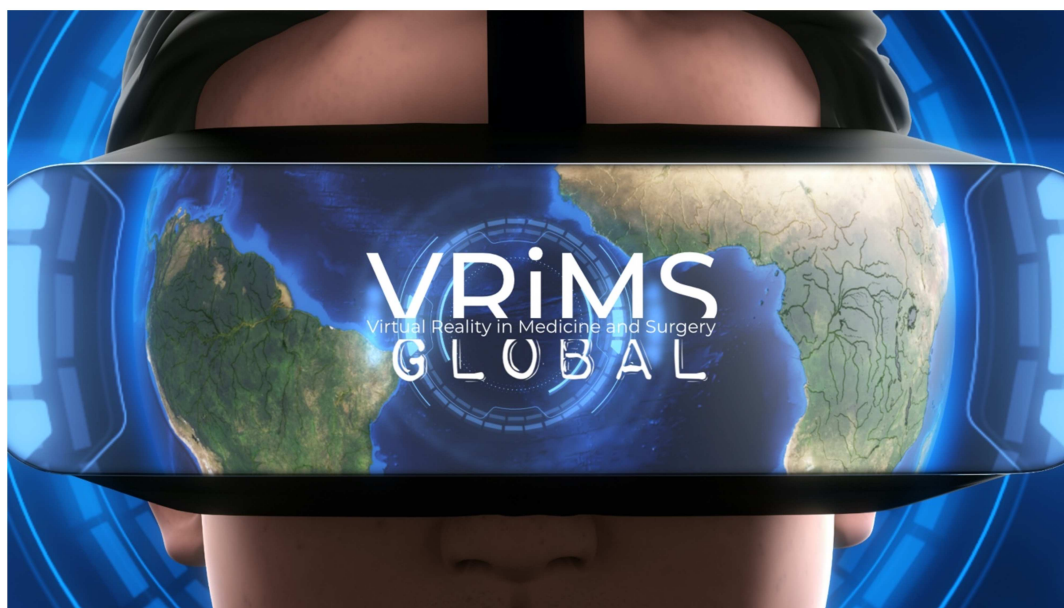


**VRiMS**  
(Virtual Reality in  
Medicine and Surgery)

**GLOBAL MEDICINE/SURGERY  
EDUCATIONAL CONFERENCE**

**26-29<sup>th</sup> APRIL**

Ideal for surgical residents, surgeons, medical officers  
and medical students.

Registration needed, request link from [vrims.ug@gmail.com](mailto:vrims.ug@gmail.com)

If unable to attend in person remote access is open to all  
free of charge

OUR PARTNERS :

Venue: Uganda Christian University and  
IDI, Makerere University Kampala

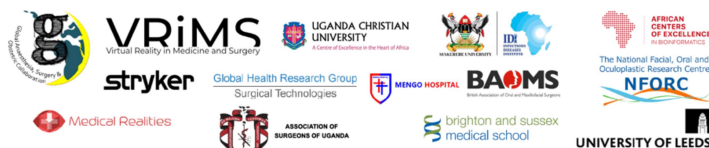

| DAY ONE: Tuesday 26 <sup>th</sup> April 2022                 |                                                                                                                                                                                                                                                                              |                                                                        |          |
|--------------------------------------------------------------|------------------------------------------------------------------------------------------------------------------------------------------------------------------------------------------------------------------------------------------------------------------------------|------------------------------------------------------------------------|----------|
| INTRODUCTION & STABILISATION OF THE TRAUMA PATIENT           |                                                                                                                                                                                                                                                                              |                                                                        |          |
| All times in EAT, Kampala (UK BST = EAT-2hrs)                |                                                                                                                                                                                                                                                                              |                                                                        |          |
| Time                                                         | Topic                                                                                                                                                                                                                                                                        | Speaker                                                                | Delivery |
| <b>INTRODUCTION to VR (0900-0930 Kampala delegates only)</b> |                                                                                                                                                                                                                                                                              |                                                                        |          |
| 0900                                                         | Registration                                                                                                                                                                                                                                                                 | -                                                                      | -        |
| 0915                                                         | Introduction to Virtual Reality from the Ugandan-based team                                                                                                                                                                                                                  | Dr Helen Please & Mike Nsubuga                                         | Lecture  |
| 0930                                                         | Smartphone setup for VR + pre-course questions                                                                                                                                                                                                                               | Dr Helen Please                                                        | Lecture  |
| <b>INTRODUCTION to the VRiMS course</b>                      |                                                                                                                                                                                                                                                                              |                                                                        |          |
| 1015                                                         | Welcome from UK team and introduction to VRiMS                                                                                                                                                                                                                               | Prof Jag Dhanda                                                        | Lecture  |
|                                                              | Introduction to GASOC, and candidates to introduce their learning needs                                                                                                                                                                                                      | Dr William Bolton                                                      | Lecture  |
| 1035                                                         | Access to Essential Surgical Care: Patient and Provider Perspectives                                                                                                                                                                                                         | Prof Mood Bhutta                                                       | Lecture  |
| 1100                                                         | Logistics in Country and Ugandan Faculty Perspective                                                                                                                                                                                                                         | Dr Helen Please, Dr Henry Luweesi, Dr Billy Ndiwalana, Dr Daudi Jjingo | Lecture  |
| 1120                                                         | Trauma Care: Epidemiology and Principles of Management                                                                                                                                                                                                                       | Prof Mansoor Khan                                                      | Lecture  |
| 1200                                                         | Tea break                                                                                                                                                                                                                                                                    |                                                                        |          |
| <b>STABILISATION OF THE TRAUMA PATIENT</b>                   |                                                                                                                                                                                                                                                                              |                                                                        |          |
| 1230                                                         | Resuscitation and stabilisation: Airway                                                                                                                                                                                                                                      | Dr Stel Panayiotou & Prof Mood Bhutta                                  | Lecture  |
| 1300                                                         | <b>Simulation Model Demonstration/Cadaveric Dissection</b> <ul style="list-style-type: none"> <li>Airway: Intubation, cricothyroidotomy, tracheostomy</li> </ul>                                                                                                             | Dr Stel Panayiotou, Prof Mood Bhutta & Dr Henry Luweesi                | VR       |
| 1400                                                         | Lunch                                                                                                                                                                                                                                                                        |                                                                        |          |
| 1445                                                         | Resuscitation and stabilisation: Breathing and Circulation                                                                                                                                                                                                                   | Prof Mansoor Khan                                                      | Lecture  |
| 1515                                                         | <b>Simulation Model Demonstration/Cadaveric Dissection</b> <ul style="list-style-type: none"> <li>Breathing: Chest drain</li> <li>Circulation: Venous access / iv cut-down / intraosseous access</li> <li>Repair of vascular injuries</li> <li>Pericardiocentesis</li> </ul> | Dr Stel Panayiotou, Prof Mansoor Khan & Dr Henry Luweesi               | VR       |
| 1800                                                         | Official Close of Day 1                                                                                                                                                                                                                                                      |                                                                        |          |

Form to be completed  
**before** the course:

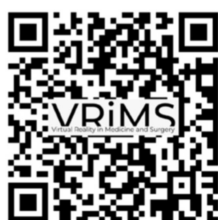

**VRiMS**  
Virtual Reality in Medicine and Surgery

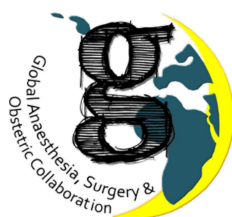

Form to be completed  
**after** the course:

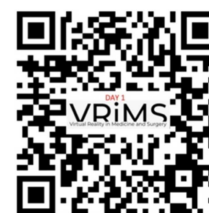

| DAY TWO: Wednesday 27 <sup>th</sup> April 2022               |                                                                                                                                                                                                                                                                                                                                                                                                                                                  |                                                     |               |
|--------------------------------------------------------------|--------------------------------------------------------------------------------------------------------------------------------------------------------------------------------------------------------------------------------------------------------------------------------------------------------------------------------------------------------------------------------------------------------------------------------------------------|-----------------------------------------------------|---------------|
| ABDOMINAL & SKIN TRAUMA; ESSENTIAL ABDOMINAL SURGERY         |                                                                                                                                                                                                                                                                                                                                                                                                                                                  |                                                     |               |
| All times in EAT, Kampala (UK BST = EAT-2hrs)                |                                                                                                                                                                                                                                                                                                                                                                                                                                                  |                                                     |               |
| Time                                                         | Topic                                                                                                                                                                                                                                                                                                                                                                                                                                            | Speaker                                             | VR or Lecture |
| <b>INTRODUCTION to VR (0900-0930 Kampala delegates only)</b> |                                                                                                                                                                                                                                                                                                                                                                                                                                                  |                                                     |               |
| 0900                                                         | Registration                                                                                                                                                                                                                                                                                                                                                                                                                                     | -                                                   | -             |
| 0915                                                         | Introduction to Virtual Reality from the Ugandan-based team                                                                                                                                                                                                                                                                                                                                                                                      | Dr Helen Please & Mike Nsubuga                      | Lecture       |
| 0930                                                         | Smartphone setup for VR + pre-course questions                                                                                                                                                                                                                                                                                                                                                                                                   | Dr Helen Please                                     | Lecture       |
| <b>ABDOMINAL TRAUMA</b>                                      |                                                                                                                                                                                                                                                                                                                                                                                                                                                  |                                                     |               |
| 1000                                                         | Metaverse and Introduction to Mozilla Hubs                                                                                                                                                                                                                                                                                                                                                                                                       | Dr Karamveer Narang                                 | Lecture       |
| 1015                                                         | Abdominal injuries                                                                                                                                                                                                                                                                                                                                                                                                                               | Prof Mansoor Khan                                   | Lecture       |
| 1045                                                         | <b>Cadaveric dissection</b> <ul style="list-style-type: none"> <li>• Diagnostic peritoneal lavage</li> <li>• Laparotomy</li> <li>• Repair of ruptured bladder</li> <li>• Repair of diaphragm</li> </ul>                                                                                                                                                                                                                                          | Prof Mansoor Khan & Dr Henry Luweesi                | VR            |
| 1200                                                         | Tea break                                                                                                                                                                                                                                                                                                                                                                                                                                        |                                                     |               |
| <b>SKIN TRAUMA</b>                                           |                                                                                                                                                                                                                                                                                                                                                                                                                                                  |                                                     |               |
| 1220                                                         | Wound and burn management                                                                                                                                                                                                                                                                                                                                                                                                                        | Dr Rob Pearl, Dr Chris Macdonald                    | Lecture       |
| 1300                                                         | <b>Simulation Model Demonstration/Cadaveric Dissection</b> <ul style="list-style-type: none"> <li>• Primary and secondary wound closure</li> <li>• Escharotomy and skin grafts</li> <li>• Tendon Repair</li> </ul>                                                                                                                                                                                                                               | Dr Rob Pearl, Dr Chris Macdonald & Dr Henry Luweesi | VR            |
| 1400                                                         | Lunch                                                                                                                                                                                                                                                                                                                                                                                                                                            |                                                     |               |
| <b>ESSENTIAL ABDOMINAL SURGERY</b>                           |                                                                                                                                                                                                                                                                                                                                                                                                                                                  |                                                     |               |
| 1445                                                         | Abdominal medicine: preventing and managing life-threatening disease                                                                                                                                                                                                                                                                                                                                                                             | Prof Mansoor Khan                                   | Lecture       |
| 1600                                                         | <b>Cadaveric dissection</b> <ul style="list-style-type: none"> <li>• Inguinal hernia repair (elective and emergency)</li> <li>• Nasogastric decompression</li> <li>• Reduction of sigmoid volvulus</li> <li>• Exploratory laparotomy</li> <li>• Appendectomy and drainage appendiceal abscess (open approach)</li> <li>• Cholecystectomy and cholecystostomy (open approach)</li> <li>• Enterolysis, small bowel resection, colostomy</li> </ul> | Prof Mansoor Khan & Dr Henry Luweesi                | VR            |
| 1800                                                         | Official Close of Day 2                                                                                                                                                                                                                                                                                                                                                                                                                          |                                                     |               |

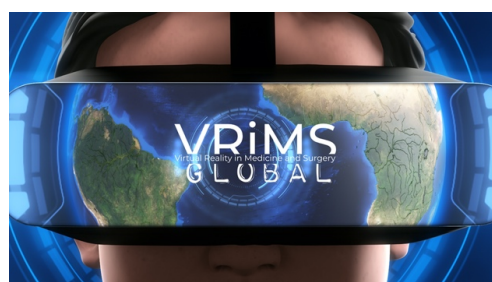

| DAY THREE: Thursday 28 <sup>th</sup> April 2022              |                                                                                                                                                                                      |                                                                                               |               |
|--------------------------------------------------------------|--------------------------------------------------------------------------------------------------------------------------------------------------------------------------------------|-----------------------------------------------------------------------------------------------|---------------|
| ORTHOPAEDIC AND HEAD TRAUMA                                  |                                                                                                                                                                                      |                                                                                               |               |
| All times in EAT, Kampala (UK BST = EAT-2hrs)                |                                                                                                                                                                                      |                                                                                               |               |
| Time                                                         | Topic                                                                                                                                                                                | Speaker                                                                                       | VR or Lecture |
| <b>INTRODUCTION to VR (0900-0930 Kampala delegates only)</b> |                                                                                                                                                                                      |                                                                                               |               |
| 0900                                                         | Registration                                                                                                                                                                         | -                                                                                             | -             |
| 0915                                                         | Introduction to Virtual Reality from the Ugandan-based team                                                                                                                          | Dr Helen Please & Mike Nsubuga                                                                | Lecture       |
| 0930                                                         | Smartphone setup for VR + pre-course questions                                                                                                                                       | Dr Helen Please                                                                               | Lecture       |
| <b>ORTHOPAEDIC TRAUMA</b>                                    |                                                                                                                                                                                      |                                                                                               |               |
| 1000                                                         | Principles of fracture management & traction                                                                                                                                         | Dr Enis Guryel                                                                                | Lecture       |
| 1040                                                         | <b>Simulation Model Demonstration/Cadaveric Dissection</b> <ul style="list-style-type: none"> <li>• Cast application for lower limb injuries</li> <li>• External fixation</li> </ul> | Dr Heidi Wilson-Le-Moine, Dr Enis Guryel & Dr Okello                                          | VR            |
| 1200                                                         | Tea break                                                                                                                                                                            |                                                                                               |               |
| 1220                                                         | Managing limb injuries                                                                                                                                                               | Dr Enis Guryel                                                                                | Lecture       |
| 1300                                                         | <b>Cadaveric dissection</b> <ul style="list-style-type: none"> <li>• Open fracture initial debridement</li> <li>• Lower limb fasciotomy</li> <li>• Below knee amputation</li> </ul>  | Dr Enis Guryel & Dr Okello                                                                    | VR            |
| 1400                                                         | Lunch                                                                                                                                                                                |                                                                                               |               |
| <b>HEAD TRAUMA</b>                                           |                                                                                                                                                                                      |                                                                                               |               |
| 1445                                                         | Head injury                                                                                                                                                                          | Dr Jin Ekanayaka                                                                              | Lecture       |
| 1615                                                         | <b>Cadaveric dissection</b> <ul style="list-style-type: none"> <li>• Burr hole</li> <li>• Craniotomy and craniocentesis</li> </ul>                                                   | Dr Jin Ekanayaka & Dr Kiryabwire, Dr Oscar Obiga & Dr Deogracious Edemaga & Dr William Bolton | VR            |
| 1800                                                         | Official Close of Day 3                                                                                                                                                              |                                                                                               |               |

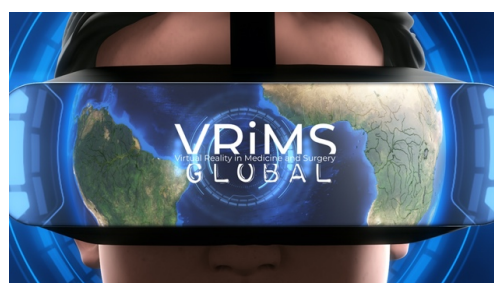

| DAY FOUR: Friday 29 <sup>th</sup> April 2022                 |                                                                                                                                                                                                                                                                                                                                                          |                                                    |               |
|--------------------------------------------------------------|----------------------------------------------------------------------------------------------------------------------------------------------------------------------------------------------------------------------------------------------------------------------------------------------------------------------------------------------------------|----------------------------------------------------|---------------|
| ESSENTIAL OBSTETRIC CARE                                     |                                                                                                                                                                                                                                                                                                                                                          |                                                    |               |
| All times in EAT, Kampala (UK BST = EAT-2hrs)                |                                                                                                                                                                                                                                                                                                                                                          |                                                    |               |
| Time                                                         | Topic                                                                                                                                                                                                                                                                                                                                                    | Speaker                                            | VR or Lecture |
| <b>INTRODUCTION to VR (0900-0930 Kampala delegates only)</b> |                                                                                                                                                                                                                                                                                                                                                          |                                                    |               |
| 0900                                                         | Registration                                                                                                                                                                                                                                                                                                                                             | -                                                  | -             |
| 0915                                                         | Introduction to Virtual Reality from the Ugandan-based team                                                                                                                                                                                                                                                                                              | Dr Helen Please & Mike Nsubuga                     | Lecture       |
| 0930                                                         | Smartphone setup for VR + pre-course questions                                                                                                                                                                                                                                                                                                           | Dr Helen Please                                    | Lecture       |
| <b>ESSENTIAL OBSTETRIC CARE</b>                              |                                                                                                                                                                                                                                                                                                                                                          |                                                    |               |
| 1000                                                         | Obstetric medicine: Managing complications of pregnancy (tbc)                                                                                                                                                                                                                                                                                            | Dr John Dalton, Dr Billy Ndiwalana, Dr Cathy Shutt | Lecture       |
| 1030                                                         | <b>Model demonstration</b><br>Assisted vaginal delivery with forceps or vacuum                                                                                                                                                                                                                                                                           | Dr John Dalton, Dr Billy Ndiwalana, Dr Cathy Shutt | VR            |
| 1200                                                         | Tea break                                                                                                                                                                                                                                                                                                                                                |                                                    |               |
| 1220                                                         | <b>Simulation Model Demonstration/Cadaveric Dissection</b> <ul style="list-style-type: none"> <li>• Manual vacuum aspiration</li> <li>• Dilation and curettage, culdocentesis, culpotomy</li> <li>• Caesarean section</li> <li>• Repair ruptured uterus / vaginal tear / cervical tear / perineal tear</li> <li>• Salpingotomy/ salpingectomy</li> </ul> | Dr John Dalton, Dr Billy Ndiwalana, Dr Cathy Shutt | VR            |
| 1400                                                         | Lunch                                                                                                                                                                                                                                                                                                                                                    |                                                    |               |
| 1445                                                         | Obstetric medicine: Post-partum haemorrhage                                                                                                                                                                                                                                                                                                              | Dr John Dalton, Dr Billy Ndiwalana, Dr Cathy Shutt | Lecture       |
| 1600                                                         | <b>Simulation Model Demonstration/Cadaveric Dissection</b> <ul style="list-style-type: none"> <li>• Manual removal of placenta</li> <li>• Uterine and utero-ovarian artery ligation</li> <li>• Bimanual compression of uterus</li> <li>• Uterine inversion</li> <li>• Total and sub-total hysterectomy</li> </ul>                                        | Dr John Dalton, Dr Billy Ndiwalana, Dr Cathy Shutt | VR            |
| <b>DEBRIEF AND CLOSE</b>                                     |                                                                                                                                                                                                                                                                                                                                                          |                                                    |               |
| 1730                                                         | Debrief and course feedback                                                                                                                                                                                                                                                                                                                              |                                                    |               |
| 1800                                                         | End of course                                                                                                                                                                                                                                                                                                                                            |                                                    |               |



Supplement: bmjoq-2023-002477supp002.pdf [file bmjoq-2023-002477supp002.pdf]
